# Supplementary material
Source: HighWire-hosted journal article supplement (https://ajnr-sso.highwirestaging.com/highwire/filestream/111231/field_highwire_adjunct_files/0/0564.pdf)
Supplement: 0564.pdf [file 0564.pdf]

| Age in years (symptom onset) and sex | Presenting symptoms                                                         | Connective tissue disorder / genetic diagnosis                                    | Brain MRI findings (with IV contrast unless otherwise specified) | Noncontrast Spine MRI findings                          | Myelographic test            | Leak location | Leak type                                                  | Treatment / follow-up if available (timing of follow-up)                                   |
|--------------------------------------|-----------------------------------------------------------------------------|-----------------------------------------------------------------------------------|------------------------------------------------------------------|---------------------------------------------------------|------------------------------|---------------|------------------------------------------------------------|--------------------------------------------------------------------------------------------|
| 15F                                  | Orthostatic headache<br><br>Nausea                                          | None                                                                              | Brain sagging, dural enhancement, venous distention              | Extradural CSF                                          | Prone dynamic CTM            | T5-T6         | Ventral dural tear with spinal cord herniation             | Targeted blood patch followed by surgical repair<br><br>Symptomatic resolution (5 months)  |
| 12M                                  | Orthostatic headache                                                        | None                                                                              | Brain sagging, venous distention                                 | No extradural CSF                                       | Decubitus CTM                | L T6          | CSF-venous fistula (internal epidural venous plexus)       | Targeted blood patch with fibrin<br><br>Symptomatic resolution (24 months)                 |
| 12F                                  | Orthostatic headache                                                        | Marfan syndrome                                                                   | Brain sagging, dural enhancement, venous distention              | Not performed                                           | Decubitus CTM                | L T10         | Lateral dural tear (with billowing arachnoid diverticulum) | Targeted blood patch followed by surgical repair<br><br>Symptomatic resolution (10 months) |
| 17F                                  | Orthostatic headache                                                        | None                                                                              | Brain sagging, dural enhancement, venous distention              | Extradural CSF                                          | Decubitus CTM                | R T11         | Lateral dural tear (with billowing arachnoid diverticulum) | Targeted blood patch followed by surgical repair<br><br>Symptomatic resolution (8 months)  |
| 17F                                  | Orthostatic headache                                                        | Klippel-Trenaunay syndrome                                                        | Brain sagging, dural enhancement, venous distention              | No extradural CSF<br><br>Paraspinal venous malformation | Decubitus DSM, cone beam CTM | L L2          | CSF-venous fistula draining to venous malformation         | Transvenous Onyx embolization<br><br>Symptomatic resolution (2 months)                     |
| 12F                                  | Orthostatic headache                                                        | None                                                                              | Not performed                                                    | Extradural CSF                                          | Decubitus CTM                | L T4          | Lateral dural tear (with billowing arachnoid diverticulum) | Surgical repair<br><br>Symptomatic resolution (6 months)                                   |
| 15F                                  | Myelopathy (sensory deficits and hyperreflexia)<br><br>Orthostatic headache | Autosomal dominant lymphedema-distichiasis syndrome (heterozygous FOXC2 mutation) | Dural enhancement, suprasellar cistern effacement                | Extradural CSF                                          | Decubitus CTM                | L T9          | Lateral dural tear (with billowing arachnoid diverticulum) | Surgical repair<br><br>Symptomatic resolution (6 months)                                   |
| 14M                                  | Orthostatic headache                                                        | None                                                                              | Brain sagging, dural enhancement, venous distention              | Extradural CSF                                          | Decubitus CTM                | L T11         | Lateral dural tear                                         | Targeted blood patch followed by surgical repair                                           |

|     |                      |                              |                                                    |                                                            |                                      |       |                       |                                                                                            |
|-----|----------------------|------------------------------|----------------------------------------------------|------------------------------------------------------------|--------------------------------------|-------|-----------------------|--------------------------------------------------------------------------------------------|
|     |                      |                              |                                                    |                                                            |                                      |       |                       | Symptomatic resolution (10 months)                                                         |
| 9F  | Orthostatic headache | Kaposiform lymphangiomatosis | Brain sagging, venous distention (noncontrast MRI) | No extradural CSF<br><br>Paraspinal lymphatic malformation | Decubitus CTM                        | R T10 | CSF-lymphatic fistula | Targeted blood patch followed by surgical repair<br><br>Symptomatic resolution (22 months) |
| 13M | Orthostatic headache | None                         | Dural enhancement, venous distention               | Extradural CSF                                             | Decubitus CTM, reverse Trendelenburg | L S1  | Lateral dural tear    | Targeted blood patch<br><br>Symptomatic resolution (11 months)                             |
